# Supplementary material
Source: PubMed Central journal article supplement (PMC6035776)
Supplement: NIHMS965510-supplement-2.pdf [file NIHMS965510-supplement-2.pdf]

Supplementary Table 1. Numbers of male and female mice used in electrophysiological, fiber photometry and behavioural experiments.

| Experiment (Figure)                                      | # of Males | # of Females |
|----------------------------------------------------------|------------|--------------|
| 1c mIPSC Naïve                                           | 2          | 2            |
| 1c mIPSC Restraint                                       | 2          | 2            |
| 1c mIPSC Foothock                                        | 2          | 2            |
| 1c mIPSC Restraint/24h                                   | 1          | 1            |
| 1h SuperClomeleon                                        | 5          | 4            |
| 2b mIPSC D2 <sup>+</sup> neurons - Quinpirole            | 2          | 2            |
| 2b mIPSC D2 <sup>-</sup> neurons - Quinpirole            | 2          | 2            |
| 2b mIPSC D2 <sup>+</sup> /Restraint neurons - Quinpirole | 2          | 2            |
| 2h mIPSC Naïve shRNA <sup>+</sup>                        | 2          | 2            |
| 2h mIPSC Restraint shRNA <sup>+</sup>                    | 2          | 1            |
| 2i mIPSC Naïve shRNA <sup>-</sup>                        | 2          | 1            |
| 2i mIPSC Restraint shRNA <sup>-</sup>                    | 2          | 1            |
| 3c GABA Puff                                             | 3          | 3            |
| 3c GABA Puff+ quinpirole                                 | 2          | 2            |
| 3f Control                                               | 2          | 2            |
| 3f Quinpirole                                            | 5          | 5            |
| 4b Microdialysis                                         | 4          | 3            |
| 4h LC GCaMP6s fiber photometry                           | 2          | 2            |
| 4j Microdialysis + DREADD saline                         | 4          | 3            |
| 4j Microdialysis + DREADD CNO                            | 3          | 4            |
| 5d SuperClomeleon + LC DREADD                            | 2          | 2            |
| 5h SuperClomeleon + LC tdTomato                          | 3          | 2            |
| 6d GCaMP6s in NAc-projecting neurons                     | 5          | 4            |
| 6h PVT GCaMP + LC halorhodopsin                          | 2          | 2            |
| 6l PVT GCaMP + tdTomato                                  | 3          | 2            |
| 7d LC tdTomato + fear conditioning control               | 12         | 2            |
| 7d LC ChR2 + fear conditioning control                   | 12         | 2            |
| Supplementary 4c PVT SuperClomeleon + THIP/Sal           | 2          | 1            |
| Supplementary 8 NE microdialysis + LC DREADD SAL         | 4          | 3            |
| Supplementary 8 NE microdialysis + LC DREADD CNO         | 3          | 4            |
| Supplementary 9b PTX bath application                    | 2          | 1            |
| Supplementary 10d D2 GCaMP fiber photometry              | 2          | 2            |
| Supplementary 12d Tail Susp                              | 2          | 2            |
| Supplementary 13 Locomotion correlation                  | 1          | 1            |
| Supplementary 14 LC ChR2 mIPSC                           | 2          | 2            |
| Supplementary 14 LC ChR2 mIPSC + Sulpiride               | 3          | 2            |
